1 **Title: Phage Cocktails can Prevent the Evolution of Phage-Resistant**  
2 ***Enterococcus***

3

4 Stephen Wandro<sup>a</sup>, Pooja Ghatbale<sup>b</sup>, Hedieh Attai<sup>b</sup>, Clark Hendrickson<sup>a</sup>, Cyril  
5 Samillano<sup>a</sup>, Joy Suh<sup>a</sup>, David T. Pride<sup>b,c</sup>, and Katrine Whiteson<sup>a#</sup>

6

7 <sup>a</sup>Department of Molecular Biology and Biochemistry, University of California, Irvine

8 <sup>b</sup>Department of Pathology, University of California, San Diego

9 <sup>c</sup>Department of Medicine, University of California, San Diego

10

11 Running Head: Phage cocktails can prevent *Enterococcus* resistance

12

13 #Address correspondence to Katrine Whiteson, [katrine@uci.edu](mailto:katrine@uci.edu)

14 Stephen Wandro and Pooja Ghatbale contributed equally to this work. Author order was  
15 determined on the basis of seniority.

16

17 Word count (abstract): 231

18 Word count (main text): 4377 (with methods); 3074 (Intro to Methods)

19

## 20 **ABSTRACT**

21           Antibiotic resistant *Enterococcus* infections are a major health crisis that requires  
22 the development of alternative therapies. Phage therapy could be an alternative to  
23 antibiotics and has shown promise in *in vitro* and in early clinical studies. Phage therapy  
24 is often deployed as a cocktail of phages, but there is little understanding of how to most  
25 effectively combine phages. Here we utilized a collection of 20 *Enterococcus* phages to  
26 test principles of phage cocktail design and determine the phenotypic effects of evolving  
27 phage resistance in *Enterococcus* isolates that were susceptible or resistant to  
28 antibiotics (e.g., Vancomycin Resistant Enterococcus (VRE)). We tested the ability of  
29 each phage to clear *Enterococcus* host cultures and prevent the emergence of phage  
30 resistant *Enterococcus*. We found that some phages which were ineffective individually  
31 were effective at clearing the bacterial culture when used in cocktails. To understand  
32 the dynamics within phage cocktails, we used qPCR to track which phages increased in  
33 abundance in each cocktail, and saw dynamics ranging from one dominant phage to  
34 even phage growth. Further, we isolated several phage-resistant mutants to test for  
35 altered Vancomycin sensitivity. We found that mutants tended to have no change or  
36 slightly increased resistance to Vancomycin. By demonstrating the efficacy of phage  
37 cocktails in suppressing growth of antibiotic susceptible and VRE clinical isolates when  
38 exposed to phages, this work will help to inform cocktail design for future phage therapy  
39 applications.

40

## 41 **IMPORTANCE**

42 Antibiotic resistant *Enterococcus* infections are a major health crisis that requires the  
43 development of alternative therapies. Phage therapy could be an alternative to

44 antibiotics and has shown promise in *in vitro* and in early clinical studies. Phage therapy  
45 in the form of cocktails is often suggested, with similar goals as the combination therapy  
46 that has been successful in the treatment of HIV infection, but there is little  
47 understanding about how to combine phages most effectively. Here we utilized a  
48 collection of 20 *Enterococcus* phages to test whether several phage cocktails could  
49 prevent the host from evolving resistance to therapy and to determine whether evolving  
50 resistance to phages affected host susceptibility to antibiotics. We showed that cocktails  
51 of two or three unrelated phages often prevented the growth of phage-resistant mutants,  
52 when the same phages applied individually were not able to.

53

54

## 55 INTRODUCTION

56 Antibiotic resistant bacterial infections have emerged as a major health crisis.  
57 Overuse of antibiotics has led to rising rates of antibiotic resistance and, therefore,  
58 steps must be taken to develop alternative therapies. The ESKAPE pathogens are six  
59 high-priority antibiotic resistant bacteria that are responsible for the majority of antibiotic  
60 resistant hospital acquired infections <sup>1</sup>. Among the ESKAPE pathogens is *Enterococcus*  
61 *faecium*, a gram-positive bacterium responsible for several human illnesses, including  
62 sepsis, urinary tract infections (UTIs), endocarditis, wound infections and alcoholic liver  
63 disease <sup>2-6</sup>. *Enterococcus* species are regular members of vertebrate gut microbiomes,  
64 and they are also pathogens of enormous clinical significance due to their high potential  
65 for resistance to antibiotics (e.g. vancomycin) <sup>7</sup>. Antibiotic treatment leads to a high  
66 abundance of *Enterococcus* spp. in the gut, as many other members of a healthy gut  
67 microbial community are more sensitive to antibiotic treatment <sup>4,8-10</sup>. There are multiple  
68 species of *Enterococcus* that are known to cause human disease, but the most common  
69 are *Enterococcus faecium* and *Enterococcus faecalis*. Both species are capable of  
70 developing resistance to the antibiotic vancomycin. Each of these *Enterococcus* species  
71 is known to cause disease, particularly in individuals who have been treated with  
72 multiple antibiotics. Developing alternative therapies to treat *Enterococcus* infections is  
73 of significant importance to reduce long-term infections such as endocarditis and to  
74 reduce the emergence of *Enterococcus* infections in patients who have been treated  
75 with antibiotics.

76 Because of their propensity for antibiotic resistance and their greater abundance  
77 in critically ill or antibiotic treated patients, *Enterococcus* is a logical focus for studies of  
78 basic phage biology. Surprisingly, there are relatively few characterized *Enterococcus*

79 phages. Bacteriophage (phage) therapy is an alternative treatment to antibiotics that  
80 has shown promise for treating *Enterococcus in vitro* and in animal models<sup>11–13</sup>.  
81 However, phage therapy is rarely used, and in many places is used only as salvage  
82 therapy, partly due to a relative paucity of basic research into its safety, mechanisms of  
83 action, and best practices of use.

84 Although phages are posited as a solution for antibiotic resistance, bacteria can  
85 also evolve resistance to phage infection. Bacteria exist in a constant evolutionary battle  
86 with phages, and thus have evolved many systems to resist phage infection, including  
87 preventing phage binding, restriction modification systems, CRISPR-Cas9 immunity,  
88 and abortive infection<sup>14,15</sup>. Given strong selective pressure from a single phage, bacteria  
89 often quickly evolve resistance to that phage in laboratory settings<sup>16</sup>. Phages evolve to  
90 combat and circumvent bacterial resistance mechanisms, which may provide phage  
91 therapy with an advantage over antibiotics<sup>17</sup>. Furthermore, the phenotypic effects of  
92 evolving resistance to phages are poorly understood. For example, phage-resistance  
93 may alter susceptibility to antibiotics<sup>18,19</sup>. Vancomycin resistant *Enterococcus* (VRE) that  
94 evolved resistance to phage had greatly increased susceptibility to vancomycin, in  
95 addition to mouse gut colonization defects<sup>12</sup>. Increasing antibiotic susceptibility would be  
96 an ideal outcome of evolving resistance to phage, but further research is required to  
97 determine how often these fitness trade-offs occur.

98 Phage therapy is sometimes administered as a cocktail of phages. Because  
99 many phages have narrow host ranges, multiple phage strains can be used to increase  
100 the likelihood that several or all strains of the target bacteria will be killed<sup>20,21</sup>.  
101 Theoretically, using a cocktail of phages could also decrease the chance that a phage-  
102 resistant mutant can arise, as multiple orthogonal resistance mechanisms would need

103 to evolve simultaneously. Evolving a resistance mechanism can also provide a fitness  
104 disadvantage, which can make the bacteria more susceptible to cell death via other  
105 phages. Similar to phage cocktails, combinations of antibiotics are used to treat  
106 tuberculosis infections, and combinations of antivirals are used to treat HIV<sup>22,23</sup>.  
107 However, the efficacy of phage cocktails has not been thoroughly explored, and it is  
108 often assumed without strong evidence that a cocktail of phages will be more effective  
109 than a single phage. Thus, there are no clear design principles for crafting effective  
110 phage cocktails.

111 Phage therapy has shown promise in *in vitro* and *in vivo* mouse  
112 experiments<sup>12,13,24</sup>. Additionally, *Enterococcus* phages have been shown to be effective  
113 at disrupting *Enterococcus* in biofilms, which are generally much harder to treat than  
114 planktonic cells because antibiotics have trouble penetrating biofilms<sup>13</sup>. *Enterococcus*  
115 phages have also been used to treat humans. Two phage cocktails sold by the Eliava  
116 Institute of Bacteriophages, Microbiology, and Virology in Georgia were shown to  
117 contain abundant *Enterococcus* phages<sup>25</sup>. *In vitro*, *Enterococcus* phages have been  
118 shown to be more effective than single phages at preventing the growth of resistant  
119 *Enterococcus* mutants<sup>26</sup>. While encouraging, this represents only one example of  
120 cocktail design and does not offer any insight into cocktail design principles.

121 We utilized our collection of *Enterococcus* phages to test the efficacy of different  
122 combinations of phages in killing bacteria and inhibiting the proliferation of phage-  
123 resistant mutants. We tracked the abundance of each phage in a cocktail to better  
124 understand which phages may be most responsible for the cocktail's antimicrobial  
125 activity. Finally, we measured the vancomycin susceptibility of phage-resistant mutants  
126 to determine whether evolving resistance to phage affected antibiotic susceptibility.

127

## 128 **RESULTS**

### 129 Host ranges of phages

130 We isolated phages against *Enterococcus* from influent samples from the Orange  
131 County Sanitation district, and then used plaque assays to test the phage  
132 susceptibilities of recently collected clinical isolates of *Enterococcus*, which were  
133 vancomycin resistant *Enterococcus* (VRE) or vancomycin susceptible *Enterococcus*  
134 (VSE). We identified phages that were capable of killing isolates of *E. faecium* and/or *E.*  
135 *faecalis*, but the *E. faecalis* isolates were generally more susceptible to a greater  
136 number of phages (**Figure 1**). As is observed often for clinical isolates, a much larger  
137 proportion of the *E. faecium* isolates were VRE compared to the *E. faecalis* isolates;  
138 however, we identified phages that were capable of killing both VRE and VSE isolates.  
139 Most phages from the *Myoviridae* family showed broad host ranges, especially Ben,  
140 Bop, and V12, which infected almost all the VRE and VSE isolates. Despite the  
141 differences between *E. faecium* and *E. faecalis* clinical isolates, we identified phages  
142 with broad host ranges that were capable of killing both species. Moreover, some of  
143 these phages, from *Siphoviridae*, *Myoviridae*, and *Podoviridae* families, were capable of  
144 killing highly antibiotic resistant VRE isolates.

145

### 146 Phage cocktails reduce the evolution of resistant mutants

147 To understand the advantage of using phage cocktails over single phages, we  
148 measured bacterial growth over 72 h in liquid media to observe phage lysis and detect  
149 the emergence of resistance (as seen by bacterial growth). Four *E. faecalis* strains were  
150 chosen for testing the efficacy of phage cocktails, with strain Yi6-1 allowing for the most

151 combinations because it was susceptible to 18 of the 20 phages in our collection  
152 **(Figure 1)**. The multiplicity of infection (MOI) of phage cocktails tested on *E. faecalis*  
153 strains, including 0.1, 0.01, and 0.001, did not consistently affect the emergence of  
154 phage-resistant mutants **(Supplemental Figure S1)**. Therefore, we chose to infect  
155 strains at the highest MOI of 0.1. When susceptible *Enterococcus* was infected with a  
156 single phage at MOI 0.1 in liquid media, its growth is initially stunted compared to the  
157 no-phage control, but if resistance emerges, growth is often observed within 24 to 60  
158 hours (data not shown). In a minority of instances, such as was observed for phages  
159 Bop, CCS3, SDS2, and Car, a single phage was able to prevent measurable host  
160 growth over the 72 hour period. However, for most other instances, the growth of  
161 phage-resistant *Enterococcus* emerged within 72 hours of exposure to a single phage  
162 **(Figure 2)**. There were no single phages that were able to prevent host growth over the  
163 entire 72 h period in all four *E. faecalis* strains tested.

164 When *E. faecalis* Yi6-1 was infected with combinations of two phages, some  
165 combinations consistently prevented the growth of phage-resistant mutants, while other  
166 combinations failed to do so **(Figure 2A-B)**. For *E. faecalis* strains Yi6-1, EF06, and  
167 EF11, successful two-phage cocktails were usually composed of multiple phage families  
168 (for instance, *Myoviridae* and *Siphoviridae*), but not all cocktails composed of two  
169 different families were successful at preventing growth **(Figure 2A-D)**. *E. faecalis* strain  
170 V587 (VRE) was only tested with *Myoviridae* phages, as it was not susceptible to any of  
171 the *Siphoviridae* or *Podoviridae* phages in our collection. In V587, some single-family  
172 combinations of *Myoviridae* phages were effective at preventing growth **(Figure 2E)**.  
173 Three-phage cocktails were often successful at preventing bacterial growth for all four  
174 *E. faecalis* strains **(Figure 2)**. However, adding a third phage to the cocktail did not



175 generally improve a cocktail's ability to prevent the emergence of phage resistance, as  
176 most successful three-phage cocktails contained a phage combination that worked  
177 together as two-phage cocktails.

178

### 179 *Siphoviridae* and *Podoviridae* phages dominate in most cocktails

180 To understand the dynamics of our cocktails, we used quantitative PCR (qPCR)  
181 to estimate the relative abundance of each phage in the cocktail during the course of  
182 infecting *E. faecalis* strain Yi6-1. We selected cocktails containing two or three phages  
183 that were ineffective as individual phages, but were successful as cocktails in  
184 preventing bacterial growth over 72 hours. Phage DNA was extracted immediately after  
185 phage and host inoculation (0 hours), as well as at 24, 48, and 72 hours post-  
186 inoculation. Changes in phage abundances over time in each of eight cocktails were  
187 plotted over 72 hours, as compared with the phage-only control (**Figure 3**). Optical  
188 density (OD) measurements for each culture were also plotted to demonstrate that each  
189 phage cocktail largely prevented the growth of Yi6-1 for the duration of 72 hour period.

190 Cocktail 1 contained phages Carl (*Myoviridae*), CCS2 (*Siphoviridae*), and Ben  
191 (*Myoviridae*). While the concentrations of Carl and CCS2 increased by ~1.5 log PFU/ml,  
192 the concentration of Ben increased by ~3 log PFU/ml (**Figure 3A**), suggesting that it  
193 was the most active phage in this cocktail. In cocktail 2 with phages Carl (*Myoviridae*),  
194 CCS2 (*Siphoviridae*), and SDS1 (*Siphoviridae*), change in phage concentrations  
195 remained at or below 0 PFU/ml for the first 24 h, despite preventing any detectable  
196 bacterial growth. However, at 48 and 72 h, phages CCS2 and SDS1, but not Carl, had  
197 increased abundances (**Figure 3B**). In the third phage cocktail with phages Carl  
198 (*Myoviridae*), Ump (*Podoviridae*), and SDS1 (*Siphoviridae*), all three phages increased

199 in concentration over time, with Ump increasing the most (~4 log PFU/mL), SDS1 in the  
200 middle (~2 log PFU/mL), and Carl increasing the least (~1 log PFU/mL) (**Figure 3C**).  
201 Cocktail 3 was the only cocktail in which any bacterial growth was observed, starting  
202 around 24 h in two of the three replicates and remaining at a low OD<sub>600</sub> for the  
203 remainder of the experiment, significantly lower than the OD<sub>600</sub> of >0.5 often observed  
204 when resistance emerged.

205 We also monitored the concentration of each phage in successful two-phage  
206 cocktails. In cocktail 4, *Myoviridae* phages CCS1 and Ben increased by similar  
207 amounts, with CCS1 having a slight edge (**Figure 3D**). In cocktail 5, *Siphoviridae* phage  
208 CCS2 consistently increased by ~1 log PFU/mL more than phage Ben (**Figure 3E**). Our  
209 data suggested that the phages like CCS1 and CCS2 consistently and strongly reduced  
210 bacterial growth, as their concentrations increased significantly (from 2 to ~4 and 0 to  
211 ~2.5 log PFU/ml, respectively) compared to Ben (only increased from 1.5 to ~2 log  
212 PFU/ml) (**Figure 3D, E**). In other two-phage cocktails 6 (Carl-Ump), 7 (Bill-Ump), and 8  
213 (SDS1-Ump), the *Podoviridae* phage Ump was found to have greater increases in its  
214 relative abundance (the concentration increased from 1.5 to ~ 6 log PFU/ml) compared  
215 to *Myoviridae* phages Carl and Bill (remained stable at ~2 log PFU/ml throughout the  
216 duration of infection). However, for the SDS1-Ump cocktail, a slight increase in the  
217 concentration of *Siphoviridae* phage SDS1 was observed, though still less than the  
218 change in concentration of *Podoviridae* phage Ump.

219

#### 220 Resistance to phage can modulate antibiotic susceptibility

221 We examined six *Enterococcus* phage-resistant mutants generated from three  
222 wild-type *Enterococcus* strains in the cocktail experiments to determine whether some

223 may have altered susceptibility to vancomycin. *E. faecalis* strains DP11 and Yi6 were  
224 initially susceptible to vancomycin while *E. faecalis* V587 was initially vancomycin  
225 resistant. First, mutants were sequenced to determine the mechanism of increased  
226 phage resistance (**Table 1**). Five out of six resistant mutants had mutations in the Epa  
227 exopolysaccharide synthesis locus. Phage-resistant *Enterococcus* mutants often had  
228 similar or slightly decreased levels of susceptibility to vancomycin (**Figure 4**). Many  
229 phage-resistant *Enterococcus* mutants did not achieve the same growth characteristics  
230 (OD<sub>600</sub> compared to the wild-type isolate), indicating that these mutants had growth  
231 defects.

232

## 233 **DISCUSSION**

234 Some phage cocktails have previously been shown to be effective at killing  
235 bacteria and preventing the growth of resistant mutants, but little focus has been placed  
236 on the design principles for effective cocktails. Here, we showed that phage cocktail  
237 design is an important consideration because not all combinations of phages  
238 consistently prevent the growth of phage-resistant mutants.

239 While using phage cocktails including a diversity of phages targeting multiple  
240 disparate bacterial types has been a common practice, there is no standard for how  
241 many phages should be used. The pyophage (PYO) cocktail from the Georgian Eliava  
242 Institute of Bacteriophages has been shown to contain approximately thirty different  
243 phages targeting multiple different bacterial hosts<sup>25</sup>. Recent uses of phage therapy  
244 designed to target a single strain of a bacterial species generally include between one  
245 and six phages<sup>27-29</sup>. Often there is no obvious rationale behind the number of phages  
246 chosen to administer during phage therapy, although lack of access to phage that can

247 infect a host of interest may be an important limitation. Here, we show that combinations  
248 of two phages are often enough to prevent the growth of phage-resistant mutants. Using  
249 more than two diverse phages in a cocktail would increase the chances of choosing two  
250 phages that displayed synergy in preventing the growth of phage-resistant mutants.  
251 However, increasing the number of phages could pose the risk of antagonistic  
252 interactions between phages<sup>30</sup>.

253 Several approaches exist for optimizing phage cocktail design. Experimental  
254 evolution of a phage can result in mutant phages with expanded host ranges, which can  
255 be used in phage cocktails<sup>31,32</sup>. Another approach is to use phage-resistant hosts to  
256 isolate new phages with complementary host ranges<sup>33</sup>. Synthetic approaches can also  
257 be effective, such as using site-directed mutagenesis to create phages that bind to  
258 different sites and would thus complement each other in a phage cocktail<sup>34</sup>. Our  
259 experiments relied on the diversity of our phage collection to create cocktails, but many  
260 bacterial hosts lack large collections of characterized phages. Evolutionary or synthetic  
261 approaches would be useful for expanding phage catalogs for specific hosts.

262 Some phages in our collection were effective against *E. faecalis* and *E. faecium*,  
263 including both VRE and VSE isolates. This suggests that these phages would be good  
264 candidates for phage cocktails to eradicate a variety of *Enterococcus* isolates. If the  
265 phages in a cocktail attach to different bacterial target proteins, a cocktail of diverse  
266 phages is more capable of lysing the pathogen even when a mutant arises. As seen in  
267 **Figure 2A**, combinations of phages that individually cannot clear a culture of *E. faecalis*  
268 Yi6-1 are able to do so when used in combinations. This evidence shows that the  
269 evolutionary advantage of phage-resistant mutants can be diminished with the use of  
270 well-designed cocktails. While this is a well-known phenomenon that exists for

271 antibiotics in the treatment of diseases such as tuberculosis, our *in vitro* evidence  
272 suggests that it might also be applicable to phage therapy.

273 Comparing the abundances of each phage over time in the eight phage cocktails  
274 shown in **Figure 3** yields a wide range of outcomes, from one phage greatly outpacing  
275 the other (cocktail 6), to relatively even abundances (cocktails 1, 7, 8). All the phages  
276 used in these cocktails were ineffective at clearing *Enterococcus* cultures alone, yet all  
277 of these cocktails, with their varied phage dynamics, resulted in clearing the  
278 *Enterococcus* culture. This shows that there is not one single path to an effective phage  
279 cocktail. Even if one phage appears to be dominating, the other phage is still necessary  
280 to prevent the emergence of a phage-resistant mutant.

281 Phages that display synergy with antibiotics might be ideal for phage therapy.  
282 Synergy can occur if the evolution of resistance to phage comes at the cost of  
283 increased susceptibility to antibiotics, or vice versa. The most famous example of this is  
284 a *Pseudomonas aeruginosa* phage that binds to an antibiotic efflux pump, resulting in a  
285 fitness trade off where bacteria can evolve resistance to phage by losing the antibiotic  
286 efflux pump<sup>18</sup>. Several studies, including this one, have shown *Enterococcus* evolving  
287 resistance to phage infection through mutations in the Epa locus. While not observed in  
288 this study, Epa mutations have been seen to increase susceptibility to vancomycin in  
289 resistant strains<sup>12,35–37</sup>. The mechanism by which this fitness trade-off occurs is not  
290 clear; vancomycin targets peptidoglycan and the Epa locus regulates  
291 exopolysaccharide synthesis, so both interactions occur at the cell wall<sup>38–40</sup>. In this  
292 study, evolution of phage resistance in *Enterococcus* was not seen to sensitize VRE,  
293 and slightly increased vancomycin resistance in VSE. Different Epa mutations may have  
294 different effects on antibiotic susceptibility. In addition, the genetic background of the

295 *Enterococcus* strain likely affects the phenotypic outcomes of the evolution of phage  
296 resistance. Synergistic outcomes of phage-host co-evolution that result in better  
297 treatment options are far from guaranteed, but the enormous numbers of understudied  
298 phage-host interactions leave room for the discovery of phages that co-evolve with their  
299 pathogenic bacterial hosts in ways that make infection treatment more tractable.

300         The need for alternative therapies for antibiotic resistant bacterial infections has  
301 never been greater than it is right now with the crisis of antibiotic resistance upon us.  
302 Bacteriophages represent an alternative with the potential to overcome some of the  
303 shortcomings of antibiotics, but there are significant knowledge gaps that reduce the  
304 utility of phages in humans. Problems that face phage therapy in the future include the  
305 emergence of host resistance, limited information on how phages may collectively  
306 eradicate their hosts, and a lack of guidance on how many phages may be necessary in  
307 cocktails to achieve phage therapy goals. Using the model of the diverse bacterium  
308 *Enterococcus*, which has multiple species capable of causing debilitating human  
309 infections, and has the ability to acquire significant antibiotic resistance, we have  
310 demonstrated that phages have significant potential to kill their hosts and reduce the  
311 emergence of resistant isolates. For *Enterococcus*, our data suggest that host killing  
312 was not substantially increased by adding more than two phages to cocktails, but a  
313 larger study is needed to confirm these findings. Rationally designed phage cocktails  
314 hold the potential to significantly advance phages as antibiotic alternatives for the  
315 treatment of human pathogens such as *Enterococcus*.

316

## 317 **MATERIALS AND METHODS**

### 318 Bacterial strains and culture conditions

319           The bacterial strains used in this study are listed in **Supplemental Table S2**.  
320   Most of the *E. faecalis* and *E. faecium* strains were identified from plates that were sent  
321   to the UCSD Center for Advanced Laboratory Medicine for identification by MALDI-TOF,  
322   where the reported antibiotic susceptibilities were also assessed. A few of the strains  
323   were obtained from the Human Microbiome Project repository at the Biodefense and  
324   Emerging Infections Research Resources Repository (BEI: [www.beiresources.org](http://www.beiresources.org)). *E.*  
325   *faecalis* and *E. faecium* strains were cultured in Brain Heart Infusion (BHI) broth. All  
326   strains were grown at 37°C in liquid medium overnight with shaking. Solid medium was  
327   prepared with 1.5% agar when culturing bacteria or 1.0% bottom agar and 0.3% top  
328   agar for plaque assays.

329

#### 330 Host Range Determination

331           Phage susceptibilities were measured in several clinically relevant bacterial  
332   strains (**Supplemental Table S2**) that demonstrated multi-drug resistance, causing  
333   illness. Phage susceptibility was determined using a spot assay in which 5 µl of each  
334   phage lysate was spotted on a lawn of an *Enterococcus* strain on a 1.5% Agar plate  
335   infused with BHI. The spots were allowed to dry at room temperature for 30 min before  
336   being incubated at 37 °C for 24 h. The next day, plates were examined to identify the  
337   host's susceptibility based on the appearance of the zones of cell lysis.

338

#### 339 Determination of Multiplicity of Infection (MOI)

340           Multiplicity of infection is defined as the ratio of the number of phage particles to  
341   the number of target cells of each host. We tested three MOI (0.1, 0.01 and 0.001) as  
342   follows. A single colony was picked from a streak plate and was grown overnight in BHI

343 broth at 37 °C. The next day, the bacterial culture was diluted to 0.05 OD<sub>600</sub> in fresh BHI  
344 and once the initial dilution was completed, the serial dilution of 10<sup>-1</sup> to 10<sup>-8</sup> of each  
345 bacterial culture was performed using Phosphate Buffered Saline. For each isolate, the  
346 aliquot from serial dilutions of 10<sup>-4</sup> and 10<sup>-5</sup> were plated on 1.5% BHI agar plates and  
347 were incubated overnight at 37 °C. The next day, the number of colonies were counted  
348 on each dilution plate and the number colony forming units (CFU/ml) was determined  
349 **(Supplemental Table S1)**. A plaque assay was then performed for all the phages with  
350 their respective isolates to determine host susceptibility to phages. The cells from the  
351 log phase were infected with different phages at different dilutions. Based on plaque  
352 assay plates, we determined the titer of each phage (PFU/ml) **(Supplemental Table**  
353 **S1)**. Based on observed colony forming units (CFU/ml) of *Enterococcus* isolates and the  
354 titer of each phage (PFU/ml), the appropriate volume of isolates and phages were  
355 determined at three different MOI: 0.1, 0.01 and 0.001 to carry out growth curve  
356 experiments.

357

### 358 Phage Cocktails

359 Cocktails consisting of one, two, or three phages were tested against *E. faecalis*  
360 Yi6-1, EF06, EF11 and V587. A single colony was inoculated into BHI broth and grown  
361 overnight in a shaker at 37 °C. The next day, bacterial cultures were diluted to 0.05  
362 OD<sub>600</sub> in fresh BHI. On the basis of three different MOIs, appropriate volumes of  
363 *Enterococcus* and phages were determined and combined in a single well inside a 96-  
364 well plate along with enough BHI to make up a total volume of 200 µl. For two-phage  
365 cocktails, half of previously determined volumes of each of the two unique phage stocks  
366 were added. To conduct three-phage cocktails, one third of previously determined



367 volumes of each of the three unique phage stocks were added. To avoid desiccation in  
368 edge wells of the 96 well plates used for growth curve experiments, 200 µl of fresh BHI  
369 media was added into these edge wells to avoid desiccation issues in wells adjacent to  
370 edge wells.

371

### 372 Quantitative PCR (qPCR)

373 Phage cocktails were grown in BHI for 72 h with their respective hosts (Yi6-1,  
374 EF06 and EF11) and this experiment was carried out in 96-well plates with three  
375 biological replicates. In the positive control, phages were added without a host. For the  
376 negative control, appropriate hosts were grown in BHI for 72 h in the absence of phage.  
377 During this experiment, the respective samples were collected at four time points: 0 h,  
378 24 h, 48 h, and 72 h. From the samples collected at each time point, total genomic DNA  
379 was isolated using the DNeasy Blood and Tissue Kit (Qiagen). For the unknown  
380 standards, we performed a plaque assay for all the phages to find their concentrations  
381 in PFU/ml and the genomic DNA of the standards were isolated using the same kit.  
382 Standard curves were generated with serial dilutions of phage ( $10^{-1}$  -  $10^{-8}$ ). Phage  
383 specific primers were designed using Geneious software and are listed in  
384 **Supplemental Table S4**. The qPCR experiment was performed in 96-well PCR plate  
385 using Eppendorf Mastercycler® RealPlex with SYBR Green PCR Master Mix  
386 (Eppendorf, USA) as per the universal SYBR Green qPCR protocol where fluorescent  
387 product is detected during the last step of each cycle. The obtained melting curve data  
388 were analyzed using Eppendorf Mastercycler® RealPlex to calculate the Ct values. Ct  
389 values of the standards were then used to generate standard curves correlating log

390 PFU/ml to Ct values, which was used to estimate the concentration of each phage in the  
391 cocktails.

### 392 Generation of phage resistant *Enterococcus* mutants in Liquid Cultures

393 *Enterococcus* colonies were grown overnight and diluted to optical density at 600  
394 nm (OD<sub>600</sub>) of 0.05. We added 190 µl of *Enterococcus* and 10 µl of a highly  
395 concentrated individual phage stock into each well. 96-well plates co-inoculated with  
396 bacteria and phage/two-phage cocktail were then incubated at 37°C in a  
397 spectrophotometer, where cell density, as measured by an absorbance at OD<sub>600</sub>, was  
398 taken every 10 min for 24-72 h. During the 1-3-day incubation, any *Enterococcus* sp.  
399 culture that showed growth after a period of no growth was streaked onto 1.5% BHI-  
400 agar plates. Colonies that grew on these streak plates were considered phage resistant  
401 mutants and were used in subsequent mutant assays.

402

### 403 Vancomycin Susceptibility

404 To determine whether phage resistance mutations affected Vancomycin  
405 susceptibility or resistance, we cultured wild-type and mutant *Enterococcus* across a  
406 spectrum of relevant vancomycin concentrations. Wild-type and mutant *Enterococcus*  
407 colonies were grown overnight with BHI broth in a shaker at 37°C. The next day, all  
408 cultures were diluted to 0.05 OD<sub>600</sub> in fresh BHI. In a 96 well plate, 190 µl of  
409 *Enterococcus* and 10 µl of Vancomycin in a gradient from 0.2 to 200 µg/ml was added  
410 in triplicate to wells and incubated in a spectrophotometer at 37°C for 10 h.

411

### 412 Enterococcus Mutant Sequencing

413 DNA was extracted from *Enterococcus* mutants using the Quick-DNA Microprep  
414 Kit (Zymo #D3020). Before *Enterococcus* DNA extraction, lysozyme was added to lysis  
415 buffer at a concentration of 100 µg/ml and incubated at 37°C for 30 min. Libraries were  
416 prepared using a scaled-down protocol with the Illumina Nextera enzyme<sup>41</sup>. Short read  
417 length (75 bp) paired-end sequencing was performed on the Illumina NextSeq using the  
418 Mid Output v2 reagents. Approximately 1 million reads were obtained per sample,  
419 resulting in about 10-fold coverage across the *Enterococcus* genome.

420

#### 421 Sequencing Analysis

422 DNA sequencing reads from each phage-resistant host were aligned to their wild-  
423 type genome using Bowtie2<sup>42</sup>. Variants were called and filtered with samtools and  
424 bcftools and manually inspected using Geneious<sup>43–45</sup>. All mutations are reported in  
425 **Table 1.**

426 **DATA AVAILABILITY**

427 Data from bacterial growth assays, phage qPCR, and code for analysis and making  
428 figures are available at [https://github.com/swandro/phage\\_cocktails](https://github.com/swandro/phage_cocktails). Genomes for  
429 bacterial and phage strains used in this study will be uploaded to Genbank (Table S1,  
430 S2).

431

432 **ACKNOWLEDGEMENTS**

433 We would like to acknowledge the Orange County Sanitation District for providing  
434 influent samples from which some of the phages were isolated, a T32 training grant to  
435 Stephen Wandro (T32AI007319), an R21 awarded to Katrine Whiteson and David Pride  
436 (R21AI149354) and the UC San Diego Health Clinical Microbiology Laboratory.

437

438

439 **FIGURES AND TABLES**

440 **Figure 1.** Host ranges of *Enterococcus* phages as determined using plaque assays.

441 Complete lysis is indicated by orange boxes and white boxes represent no lysis.

442 Several vancomycin sensitive (light grey boxes around strain names) and vancomycin  
 443 resistant (dark grey boxes around strain names) *Enterococcus* isolates were used for  
 444 this study.

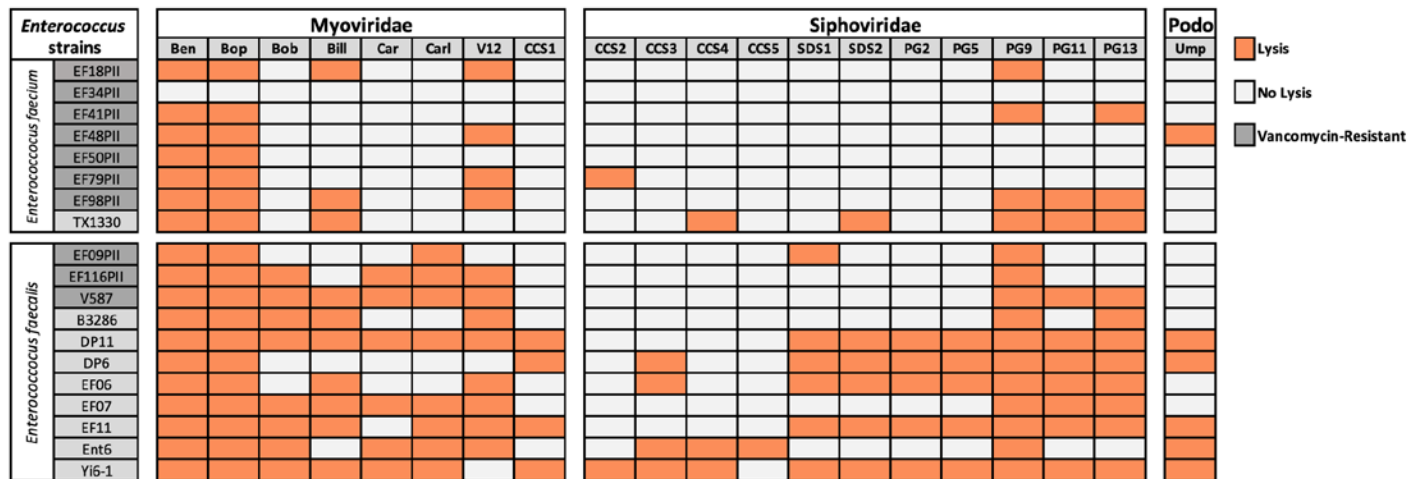

445

446

447

448

449

450

451

452

453

454

455

456 **Figure 2.** Phage cocktails clear cultures and prevent growth of *E. faecalis* for 72 h.  
457 Combinations of one, two, or three phages were added to susceptible *E. faecalis* hosts  
458 in exponential growth phase and bacterial growth after 72 h was measured by OD<sub>600</sub> .  
459 **A)** *E. faecalis* Yi6-1 cultures in which the individual phages are unable to prevent  
460 growth. **B)** *E. faecalis* Yi6-1 cultures in which the individual phages are able to prevent  
461 growth. **C)** *E. faecalis* EF06. **D)** *E. faecalis* EF11. **E)** *E. faecalis* V587 (Vancomycin  
462 resistant strain/VRE). (M): *Myoviridae* phage, (S): *Siphoviridae* phage, (P): *Podoviridae*  
463 phage.

### A) *E. faecalis* Yi6-1 Individual phages don't clear host

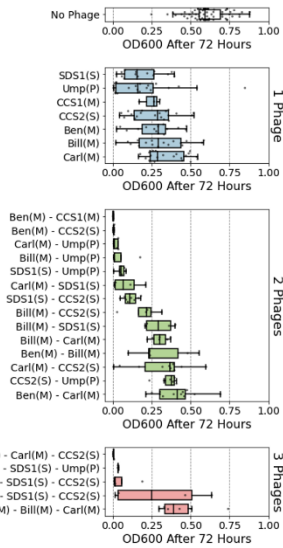

### B) *E. faecalis* Yi6-1 Individual phages do clear host

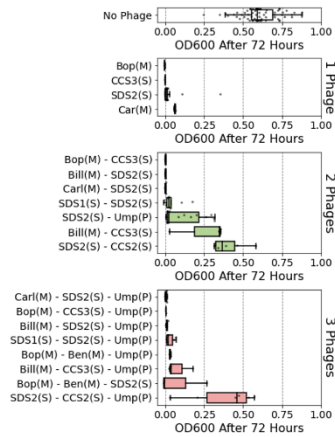

### C) *E. faecalis* EF06

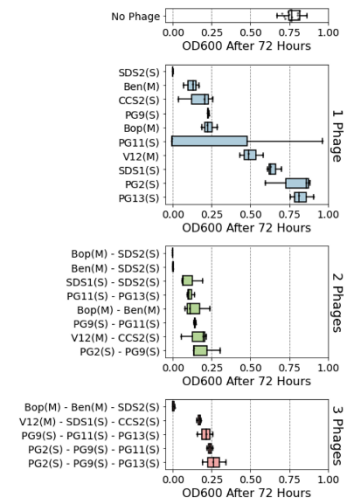

### D) *E. faecalis* EF11

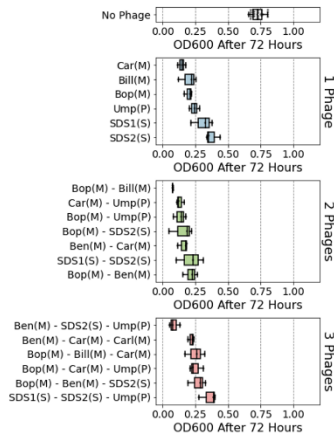

### E) *E. faecalis* V587

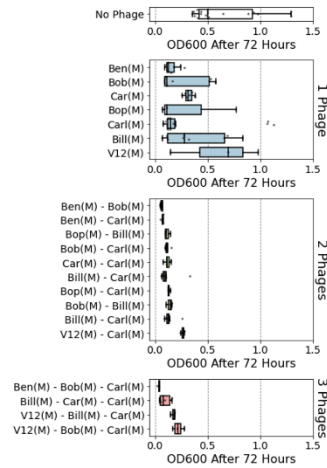

464

465

466 **Figure 3.** Tracking phage concentration changes within phage cocktails. Eight different  
467 cocktails of two or three phages were added to *E. faecalis* Yi6-1 cultures and the  
468 concentration of each individual phage was measured by qPCR every 24 h for 72 h of  
469 growth. Upper panels represent change in phage concentration and lower panels  
470 represent host growth as measured using OD<sub>600</sub> at 0, 24, 48, and 72 h post-inoculation.  
471 Solid lines represent the mean (n=3) increase in each phage's abundance since hour 0.  
472 Lighter color ribbons show standard deviation. Stars indicate significant differences  
473 between individual phage increases as determined using ANOVA ( $p < 0.05$ ).

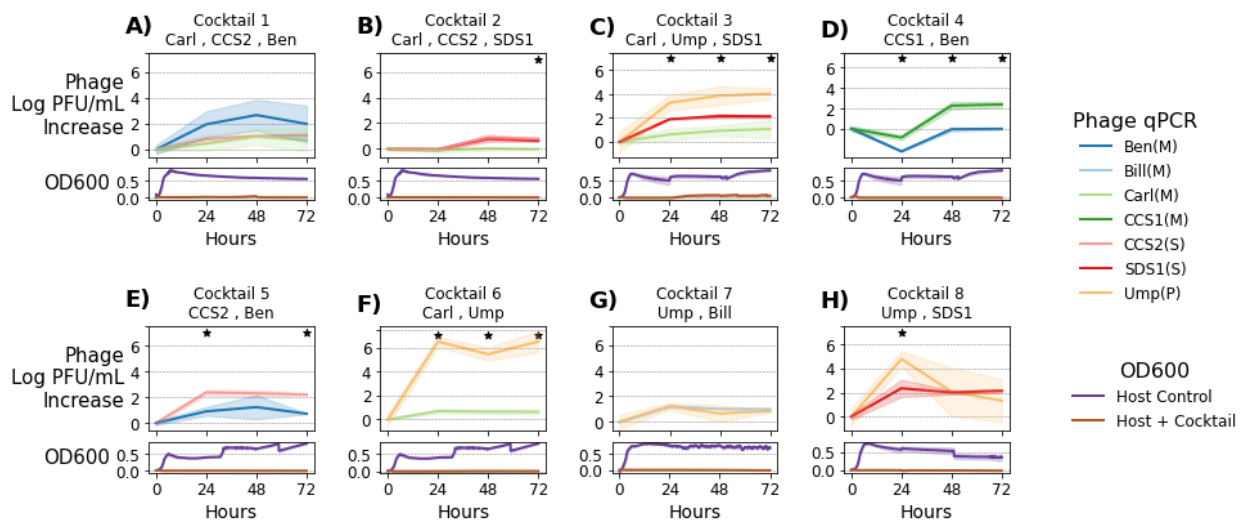

474

475



476 **Figure 4.** Vancomycin susceptibility of *Enterococcus* mutants. Bacterial growth with  
477 increasing concentrations of Vancomycin of phage-resistant *Enterococcus* mutants  
478 generated from **A) *E. faecalis* DP11**, **B) *E. faecalis* Yi6-1**, and **C) vancomycin resistant**  
479 **strain *E. faecalis* V587**. Bars represent means and error bars represent standard  
480 deviations of three biological replicates.

### A) *E. faecalis* DP11

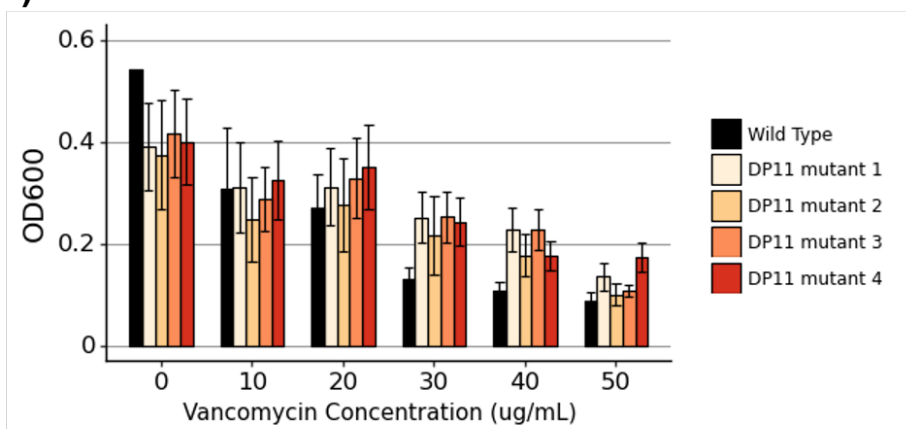

### B) *E. faecalis* Yi6-1

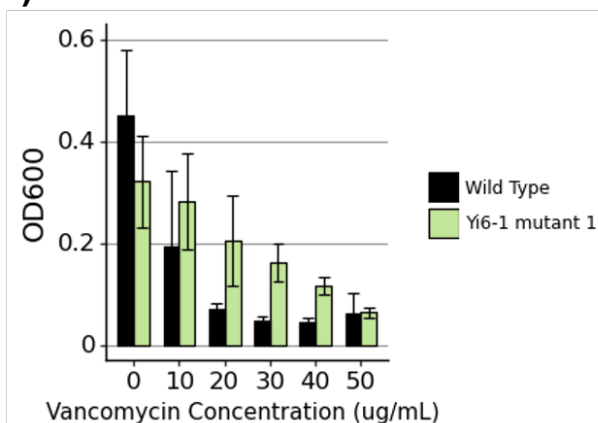

### C) *E. faecalis* V587

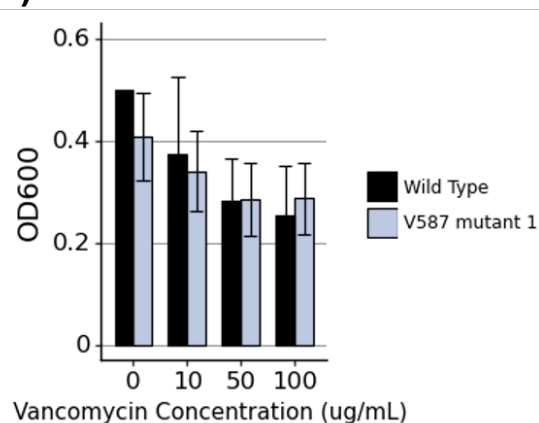

481

482

483

484

485  
486 **Table 1.** Mutations in *Enterococcus* providing phage resistance. Genes that are part of  
487 the Epa exopolysaccharide synthesis locus are denoted with (Epa).

| Host                    | Mutant   | Phage        | Mutated gene(s)                                                  | Mutation              |
|-------------------------|----------|--------------|------------------------------------------------------------------|-----------------------|
| <i>E. faecalis</i> DP11 | Mutant 1 | vB_OCPT_Ump  | (Epa) WgbU UDP-N-acetylglucosamine 4-epimerase                   | G11V                  |
| <i>E. faecalis</i> DP11 | Mutant 2 | vB_OCPT_Ump  | (Epa) WecA                                                       | E249*                 |
| <i>E. faecalis</i> DP11 | Mutant 3 | vB_OCPT_SDS1 | (Epa) WgbU UDP-N-acetylglucosamine 4-epimerase                   | G279E                 |
| <i>E. faecalis</i> DP11 | Mutant 4 | vB_OCPT_SDS2 | (Epa) TagF gene. glycerol glycerophosphotransferase              | A113E                 |
| <i>E. faecalis</i> Yi6  | Mutant 1 | vB_OCPT_CCS3 | (Epa) exopolysaccharide biosynthesis; aspartate aminotransferase | W7* ; P365S           |
| <i>E. faecalis</i> V587 | Mutant 1 | vB_OCPT_Bob  | UDP-glucose 4-epimerase GalE                                     | Silent point mutation |

488

489

490 **Supplemental Figure S1.** Effect of MOI on bacterial growth in phage cocktails. Three  
 491 different MOIs (0.1, 0.01, 0.001) were used to study the efficiency of single phages and  
 492 phage cocktails against four different *E. faecalis* isolates over the 72 h incubation  
 493 period: **A) Yi6-1, B) EF06, C) EF11, and D) V587.**

**A) *E. faecalis* Yi6-1**

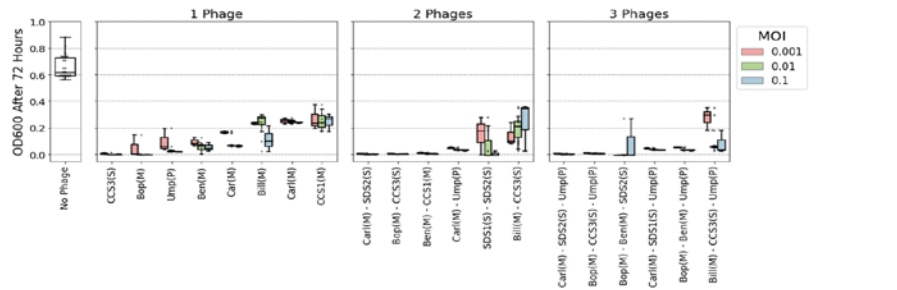

**B) *E. faecalis* EF06**

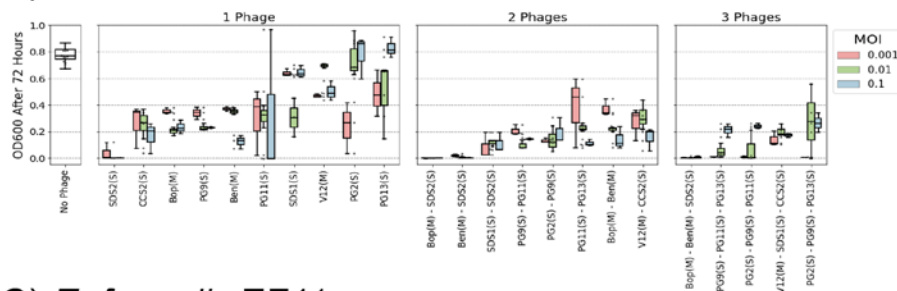

**C) *E. faecalis* EF11**

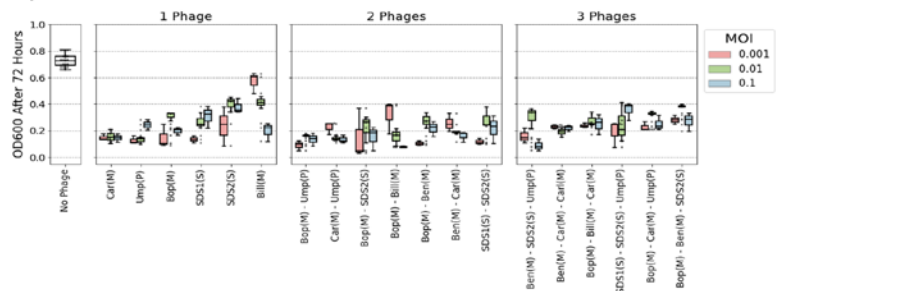

**D) *E. faecalis* V587**

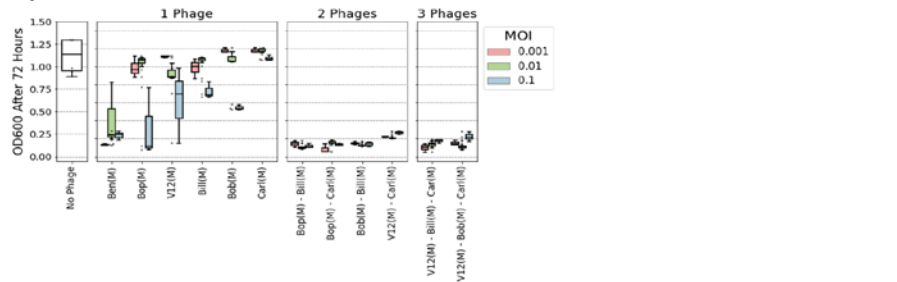

495 **Supplemental Table S1.** Phage titers and the concentration of the host. The phage  
 496 titers (Plaque forming units (PFU)/ml) were determined using plaque assays. Viable  
 497 counts of the hosts were measured by counting colonies formed from liquid cultures at  
 498 an OD<sub>600</sub> of 0.05 (CFU/60ul). All phages were titered on their corresponding susceptible  
 499 *E. faecalis* hosts: **A)** Yi6-1, **B)** EF06, **C)** EF11, and **D)** V587.

500 **A)**

| Phage family                                                                                              | Phage name   | Plaque Forming Unit (PFU/ml) | Colony Forming Unit of <i>E. faecalis</i> Yi6-1 (CFU/60μl) at OD <sub>600</sub> of 0.05 |
|-----------------------------------------------------------------------------------------------------------|--------------|------------------------------|-----------------------------------------------------------------------------------------|
| <br><b>Myoviridae</b>    | vB_OCPT_Carl | 2.1*10 <sup>10</sup>         | 6*10 <sup>6</sup>                                                                       |
|                                                                                                           | vB_OCPT_Ben  | 1.1*10 <sup>10</sup>         |                                                                                         |
|                                                                                                           | vB_OCPT_Car  | 8.1*10 <sup>7</sup>          |                                                                                         |
|                                                                                                           | vB_OCPT_Bop  | 1.23*10 <sup>8</sup>         |                                                                                         |
|                                                                                                           | vB_OCPT_CCS1 | 9.4*10 <sup>7</sup>          |                                                                                         |
|                                                                                                           | vB_OCPT_Bill | 6*10 <sup>10</sup>           |                                                                                         |
| <br><b>Siphoviridae</b> | vB_OCPT_SDS1 | 5.9*10 <sup>7</sup>          |                                                                                         |
|                                                                                                           | vB_OCPT_SDS2 | 6.8*10 <sup>7</sup>          |                                                                                         |
|                                                                                                           | vB_OCPT_CCS3 | 2.9*10 <sup>7</sup>          |                                                                                         |
|                                                                                                           | vB_OCPT_CCS2 | 3*10 <sup>9</sup>            |                                                                                         |
| <br><b>Podoviridae</b> | vB_OCPT_Ump  | 1.6*10 <sup>7</sup>          |                                                                                         |

501

502

503

**B)**

| Phage family                                                                                               | Phage name      | Plaque Forming Unit (PFU/ml) | Colony Forming Unit of <i>E. faecalis</i> EF06 (CFU/60μl) at OD <sub>600</sub> of 0.05 |
|------------------------------------------------------------------------------------------------------------|-----------------|------------------------------|----------------------------------------------------------------------------------------|
| <br><b>Myoviridae</b>   | vB_OCPT_philV12 | 2*10 <sup>6</sup>            | 1.6*10 <sup>6</sup>                                                                    |
|                                                                                                            | vB_OCPT_Ben     | 5*10 <sup>7</sup>            |                                                                                        |
|                                                                                                            | vB_OCPT_Bop     | 1.2*10 <sup>7</sup>          |                                                                                        |
|                                                                                                            | vB_OCPT_Bill    | 1.1*10 <sup>7</sup>          |                                                                                        |
| <br><b>Siphoviridae</b> | vB_OCPT_SDS1    | 1.6*10 <sup>8</sup>          |                                                                                        |
|                                                                                                            | vB_OCPT_SDS2    | 5.8*10 <sup>8</sup>          |                                                                                        |
|                                                                                                            | vB_OCPT_CCS2    | 2*10 <sup>6</sup>            |                                                                                        |
|                                                                                                            | vB_OCPT_PG6     | 2*10 <sup>6</sup>            |                                                                                        |
|                                                                                                            | vB_OCPT_PG11    | 1*10 <sup>6</sup>            |                                                                                        |
|                                                                                                            | vB_OCPT_PG9     | 3*10 <sup>7</sup>            |                                                                                        |
|                                                                                                            | vB_OCPT_PG13    | 9.5*10 <sup>6</sup>          |                                                                                        |
|                                                                                                            | vB_OCPT_PG2     | 2.4*10 <sup>7</sup>          |                                                                                        |

504

505

506

507

508

**C)**

| Phage family                                                                                             | Phage name   | Plaque Forming Unit (PFU/ml) | Colony Forming Unit of <i>E. faecalis</i> EF11 (CFU/60µl) at OD <sub>600</sub> of 0.05 |
|----------------------------------------------------------------------------------------------------------|--------------|------------------------------|----------------------------------------------------------------------------------------|
| <b>Myoviridae</b><br>   | vB_OCPT_Carl | 1.2 * 10 <sup>9</sup>        | 3.5 * 10 <sup>6</sup>                                                                  |
|                                                                                                          | vB_OCPT_Ben  | 4.0 * 10 <sup>9</sup>        |                                                                                        |
|                                                                                                          | vB_OCPT_Car  | 1.9 * 10 <sup>9</sup>        |                                                                                        |
|                                                                                                          | vB_OCPT_Bop  | 6.0 * 10 <sup>7</sup>        |                                                                                        |
|                                                                                                          | vB_OCPT_Bill | 6.0 * 10 <sup>7</sup>        |                                                                                        |
| <b>Siphoviridae</b><br> | vB_OCPT_SDS1 | 1.5 * 10 <sup>8</sup>        |                                                                                        |
|                                                                                                          | vB_OCPT_SDS2 | 2.6 * 10 <sup>7</sup>        |                                                                                        |
| <b>Podoviridae</b><br>  | vB_OCPT_Ump  | 1.6 * 10 <sup>7</sup>        |                                                                                        |

509  
510  
511

D)

| Phage family                                                                                             | Phage name   | Plaque Forming Unit (PFU/ml) | Colony Forming Unit of <i>E. faecalis</i> V587 (CFU/60µl) at OD <sub>600</sub> of 0.05 |
|----------------------------------------------------------------------------------------------------------|--------------|------------------------------|----------------------------------------------------------------------------------------|
| <b>Myoviridae</b><br> | vB_OCPT_Carl | 1.3*10 <sup>9</sup>          | 7.2*10 <sup>9</sup>                                                                    |
|                                                                                                          | vB_OCPT_Ben  | 1.3*10 <sup>9</sup>          |                                                                                        |
|                                                                                                          | vB_OCPT_Car  | 1.8*10 <sup>8</sup>          |                                                                                        |
|                                                                                                          | vB_OCPT_Bop  | 2.5*10 <sup>7</sup>          |                                                                                        |
|                                                                                                          | vB_OCPT_Bill | 5*10 <sup>9</sup>            |                                                                                        |
|                                                                                                          | vB_OCPT_Bob  | 2.2*10 <sup>9</sup>          |                                                                                        |
|                                                                                                          | vB_OCPT_V12  | 1.2*10 <sup>9</sup>          |                                                                                        |

512  
513

514 **Supplemental Table S2.** List of bacterial strains used in this study and the antibiotics to

515 which they are resistant.

| Strain   | Species            | Antibiotic Resistance                              | Accession Number |
|----------|--------------------|----------------------------------------------------|------------------|
| EF09PII  | <i>E. faecalis</i> | Tetracycline, vancomycin                           |                  |
| EF116PII | <i>E. faecalis</i> | Gentamicin-syn, tetracycline, vancomycin           |                  |
| EF06PII  | <i>E. faecium</i>  | Ampicillin, penicillin G, tetracycline, vancomycin |                  |
| EF18PII  | <i>E. faecium</i>  | Ampicillin, penicillin G, tetracycline, vancomycin |                  |

|         |                    |                                                                                                          |                          |
|---------|--------------------|----------------------------------------------------------------------------------------------------------|--------------------------|
| EF20PII | <i>E. faecium</i>  | Ampicillin, penicillin G, tetracycline, vancomycin                                                       |                          |
| EF34PII | <i>E. faecium</i>  | Ampicillin, penicillin G, tetracycline, vancomycin                                                       |                          |
| EF41PII | <i>E. faecium</i>  | Ampicillin, gentamicin-syn, penicillin G, tetracycline, vancomycin                                       |                          |
| EF48PII | <i>E. faecium</i>  | Ampicillin, penicillin G, tetracycline, vancomycin                                                       |                          |
| EF50PII | <i>E. faecium</i>  | Ampicillin, penicillin G, vancomycin                                                                     |                          |
| EF79PII | <i>E. faecium</i>  | Ampicillin, penicillin G, tetracycline, vancomycin                                                       |                          |
| EF98PII | <i>E. faecium</i>  | Ampicillin, penicillin G, tetracycline, vancomycin                                                       |                          |
| B3286   | <i>E. faecalis</i> | Erythromycin, cefazolin, ceftiofur, clindamycin, gentamicin, gent synergy, oxacillin, trimethoprim/sulfa | GenBank: AIRI000000000.1 |
| Ent6    | <i>E. faecalis</i> | Cefazolin, ceftiofur, clindamycin, gentamicin, oxacillin, trimethoprim/sulfa                             |                          |
| Tx1330  | <i>E. faecium</i>  | Cefazolin, ceftiofur, clindamycin, gentamicin, oxacillin, trimethoprim/sulfa                             | GenBank: ACHL000000000.1 |
| Yi6-1   | <i>E. faecalis</i> | Cefazolin, ceftiofur, clindamycin, gentamicin, gent synergy, oxacillin, tetracycline, trimethoprim/sulfa | GenBank: AJEO000000000.1 |
| DP11    | <i>E. faecalis</i> | Gentamicin                                                                                               |                          |
| DP6     | <i>E. faecalis</i> | -No resistant antibiotic found                                                                           |                          |
| EF06    | <i>E. faecalis</i> | -No resistant antibiotic found                                                                           |                          |
| EF11    | <i>E. faecalis</i> | Gentamicin                                                                                               |                          |
| V587    | <i>E. faecalis</i> | vancomycin, gentamicin                                                                                   | GenBank: AJBB000000000.1 |

518 **Supplemental Table S3.** Phage information. The following phages were included in  
519 these experiments.  
520

| Name         | Family       | Genus         | Genome size |
|--------------|--------------|---------------|-------------|
| vB_OCPT_Bob  | Myoviridae   | Kochiodavirus | 150k        |
| vB_OCPT_Car  | Myoviridae   | Kochiodavirus | 150k        |
| vB_OCPT_Carl | Myoviridae   | Kochiodavirus | 150k        |
| EfV12-phi1   | Myoviridae   | Schiekvirus   | 150k        |
| vB_OCPT_Ben  | Myoviridae   | Schiekvirus   | 150k        |
| vB_OCPT_Bop  | Myoviridae   | Shiekvirus    | 150k        |
| vB_OCPT_Bill | Myoviridae   | Shiekvirus    | 150k        |
| vB_OCPT_CCS1 | Myoviridae   | Shiekvirus    | 150k        |
| vB_OCPT_Tex  | Myoviridae   | Shiekvirus    | 150k        |
| vB_OCPT_SDS1 | Siphoviridae | Saphexavirus  | 57k         |
| vB_OCPT_SDS2 | Siphoviridae | Saphexavirus  | 57k         |
| vB_OCPT_CCS2 | Siphoviridae | Saphexavirus  | 57k         |
| vB_OCPT_CCS3 | Siphoviridae | Saphexavirus  | 57k         |
| vB_OCPT_Toy  | Siphoviridae | Saphexavirus  | 57k         |
| vB_OCPT_CCS4 | Siphoviridae | Efquatrovirus | 40k         |
| vB_OCPT_PG2  | Siphoviridae | Saphexavirus  | 57k         |
| vB_OCPT_PG9  | Siphoviridae | unclassified  | 57k         |
| vB_OCPT_PG11 | Siphoviridae | Saphexavirus  | 57k         |
| vB_OCPT_PG13 | Siphoviridae | Saphexavirus  | 58k         |
| vB_OCPT_Ump  | Podoviridae  | unclassified  | 18k         |

521  
522

523 **Supplemental Table S4.** DNA primers (5'→3') used to conduct qPCR experiments.

| <b>DNA primer</b> | <b>Sequence</b>       |
|-------------------|-----------------------|
| vB_OCPT_Ben_F     | AAAACAGTTGAAACAGTTATT |
| vB_OCPT_Ben_R     | TATAAGCTTACTGTTTTACCA |
| vB_OCPT_Bop_F     | AACCGTTTGCTAACCATTTTC |
| vB_OCPT_Bop_R     | GGTTTGTGTAAGTGTATA    |
| vB_OCPT_Carl_F    | CTAAAAATCTAACCAATTATC |
| vB_OCPT_Carl_R    | ATGGGTTTTTTCATTGCTAAA |
| vB_OCPT_Bill_F    | AAAACAGTTGAAACAGTTATT |
| vB_OCPT_Bill_R    | TATAAGCTTACTGTTTTACCA |
| vB_OCPT_CCS1_F    | TATGAGTAACATTAACATGGA |
| vB_OCPT_CCS1_R    | CCTGCCTTACGTAAAGAATCA |
| vB_OCPT_SDS1_F    | ACATTAACTCCTCTTAGCTT  |
| vB_OCPT_SDS1_R    | CGATTTTAGCATGCTGTTTCG |
| vB_OCPT_CCS2_F    | TTAGTAGGAAAGATTCTCTGT |
| vB_OCPT_CCS2_R    | TAAAGGATTCAATTGACTTAG |
| vB_OCPT_Ump_F     | TTAAAATGGAAGTGATTGTGG |
| vB_OCPT_Ump_R     | TTAAAAAGGCCACAGAGTTC  |

524

525



526 **REFERENCES**

527

528 1. Pogue, J. M., Kaye, K. S., Cohen, D. A. & Marchaim, D. Appropriate antimicrobial  
529 therapy in the era of multidrug-resistant human pathogens. *Clinical Microbiology  
530 and Infection* (2015) doi:10.1016/j.cmi.2014.12.025.

531 2. Duan, Y. *et al.* Bacteriophage targeting of gut bacterium attenuates alcoholic liver  
532 disease. *Nature* (2019) doi:10.1038/s41586-019-1742-x.

533 3. Hamel, M., Zoutman, D. & O'Callaghan, C. Exposure to hospital roommates as a  
534 risk factor for health care-associated infection. *Am. J. Infect. Control* (2010)  
535 doi:10.1016/j.ajic.2009.08.016.

536 4. Ubeda, C. *et al.* Vancomycin-resistant *Enterococcus* domination of intestinal  
537 microbiota is enabled by antibiotic treatment in mice and precedes bloodstream  
538 invasion in humans. *J. Clin. Invest.* **120**, 4332–41 (2010).

539 5. Arias, C. A. & Murray, B. E. The rise of the *Enterococcus*: Beyond vancomycin  
540 resistance. *Nature Reviews Microbiology* (2012) doi:10.1038/nrmicro2761.

541 6. Lebreton, F. *et al.* Emergence of epidemic multidrug-resistant *Enterococcus*  
542 *faecium* from animal and commensal strains. *MBio* (2013)  
543 doi:10.1128/mBio.00534-13.

544 7. Van Tyne, D. & Gilmore, M. S. Friend turned foe: Evolution of enterococcal  
545 virulence and antibiotic resistance. *Annual Review of Microbiology* (2014)  
546 doi:10.1146/annurev-micro-091213-113003.

547 8. Ravi, A. *et al.* Loss of microbial diversity and pathogen domination of the gut  
548 microbiota in critically ill patients. *Microb. Genomics* (2019)  
549 doi:10.1099/mgen.0.000293.

- 550 9. Gasparrini, A. J. *et al.* Persistent metagenomic signatures of early-life  
551 hospitalization and antibiotic treatment in the infant gut microbiota and resistome.  
552 *Nat. Microbiol.* (2019) doi:10.1038/s41564-019-0550-2.
- 553 10. Taur, Y. *et al.* Intestinal domination and the risk of bacteremia in patients  
554 undergoing allogeneic hematopoietic stem cell transplantation. *Clin. Infect. Dis.*  
555 (2012) doi:10.1093/cid/cis580.
- 556 11. Yoong, P., Schuch, R., Nelson, D. & Fischetti, V. A. Identification of a broadly  
557 active phage lytic enzyme with lethal activity against antibiotic-resistant  
558 *Enterococcus faecalis* and *Enterococcus faecium*. *J. Bacteriol.* **186**, 4808–12  
559 (2004).
- 560 12. Chatterjee, A. *et al.* Bacteriophage resistance alters antibiotic mediated intestinal  
561 expansion of enterococci. *bioRxiv* 531442 (2019) doi:10.1101/531442.
- 562 13. Khalifa, L. *et al.* Targeting *Enterococcus faecalis* Biofilms with Phage Therapy.  
563 *Appl. Environ. Microbiol.* **81**, 2696–2705 (2015).
- 564 14. Dy, R. L., Richter, C., Salmond, G. P. C. & Fineran, P. C. Remarkable  
565 Mechanisms in Microbes to Resist Phage Infections. *Annu. Rev. Virol.* **1**, 307–331  
566 (2014).
- 567 15. Lopatina, A., Tal, N. & Sorek, R. Abortive Infection: Bacterial Suicide as an  
568 Antiviral Immune Strategy. *Annu. Rev. Virol.* **7**, 371–384 (2020).
- 569 16. Chao, L., Levin, B. R. & Stewart, F. M. A Complex Community in a Simple  
570 Habitat: An Experimental Study with Bacteria and Phage. *Ecology* **58**, 369–378  
571 (1977).
- 572 17. Samson, J. E., Magadán, A. H., Sabri, M. & Moineau, S. Revenge of the phages:  
573 defeating bacterial defences. *Nat. Rev. Microbiol.* **11**, 675–687 (2013).

- 574 18. Chan, B. K. *et al.* Phage selection restores antibiotic sensitivity in MDR  
575 *Pseudomonas aeruginosa*. *Sci. Rep.* **6**, 26717 (2016).
- 576 19. Liu, M. C. *et al.* Sensitive and specific multi-cancer detection and localization  
577 using methylation signatures in cell-free DNA. *Ann. Oncol.* **31**, 745–759 (2020).
- 578 20. Flores, C. O., Meyer, J. R., Valverde, S., Farr, L. & Weitz, J. S. Statistical  
579 structure of host-phage interactions. *Proc. Natl. Acad. Sci. U. S. A.* **108**, E288-97  
580 (2011).
- 581 21. Chan, B. K., Abedon, S. T. & Loc-Carrillo, C. Phage cocktails and the future of  
582 phage therapy. *Future Microbiology* vol. 8 769–783 (2013).
- 583 22. Günthard, H. F. *et al.* Antiretroviral Drugs for Treatment and Prevention of HIV  
584 Infection in Adults. *JAMA* **316**, 191 (2016).
- 585 23. Tornheim, J. A. & Dooley, K. E. The Global Landscape of Tuberculosis  
586 Therapeutics. *Annu. Rev. Med.* **70**, 105–120 (2019).
- 587 24. Khalifa, L. *et al.* Phage therapy against *Enterococcus faecalis* in dental root  
588 canals. *J. Oral Microbiol.* **8**, 32157 (2016).
- 589 25. Villarroel, J., Larsen, M. V., Kilstrup, M. & Nielsen, M. Metagenomic Analysis of  
590 Therapeutic PYO Phage Cocktails from 1997 to 2014. *Viruses* **9**, (2017).
- 591 26. Khalifa, L. *et al.* Defeating Antibiotic- and Phage-Resistant *Enterococcus faecalis*  
592 Using a Phage Cocktail in Vitro and in a Clot Model. *Front. Microbiol.* **9**, 326  
593 (2018).
- 594 27. Wright, A., Hawkins, C. H., Änggård, E. E. & Harper, D. R. A controlled clinical  
595 trial of a therapeutic bacteriophage preparation in chronic otitis due to antibiotic-  
596 resistant *Pseudomonas aeruginosa*; A preliminary report of efficacy. *Clin.*  
597 *Otolaryngol.* **34**, 349–357 (2009).

- 598 28. Schooley, R. T. *et al.* Development and use of personalized bacteriophage-based  
599 therapeutic cocktails to treat a patient with a disseminated resistant *Acinetobacter*  
600 *baumannii* infection. *Antimicrob. Agents Chemother.* AAC.00954-17 (2017)  
601 doi:10.1128/AAC.00954-17.
- 602 29. Duplessis, C. *et al.* Refractory *Pseudomonas* Bacteremia in a 2-Year-Old  
603 Sterilized by Bacteriophage Therapy. *J. Pediatric Infect. Dis. Soc.* (2017)  
604 doi:10.1093/jpids/pix056.
- 605 30. Wright, R. C. T., Friman, V. P., Smith, M. C. M. & Brockhurst, M. A. Resistance  
606 evolution against phage combinations depends on the timing and order of  
607 exposure. *MBio* **10**, (2019).
- 608 31. Kelly, D., McAuliffe, O., O'Mahony, J. & Coffey, A. Development of a broad-host-  
609 range phage cocktail for biocontrol. *Bioeng. Bugs* **2**, 31–37 (2011).
- 610 32. Burrowes, B. *et al.* Directed in Vitro Evolution of Therapeutic Bacteriophages: The  
611 Appelmans Protocol. *Viruses* **11**, 241 (2019).
- 612 33. Gu, J. *et al.* A Method for Generation Phage Cocktail with Great Therapeutic  
613 Potential. *PLoS One* **7**, e31698 (2012).
- 614 34. Filippov, A. A. *et al.* Bacteriophage-Resistant Mutants in *Yersinia pestis*:  
615 Identification of Phage Receptors and Attenuation for Mice. *PLoS One* **6**, e25486  
616 (2011).
- 617 35. Wandro, S. *et al.* Predictable Molecular Adaptation of Coevolving *Enterococcus*  
618 *faecium* and Lytic Phage EfV12-phi1. *Front. Microbiol.* **9**, 3192 (2019).
- 619 36. Singh, K. V., Lewis, R. J. & Murray, B. E. Importance of the *epa* Locus of  
620 *Enterococcus faecalis* OG1RF in a Mouse Model of Ascending Urinary Tract  
621 Infection. *J. Infect. Dis.* **200**, 417–420 (2009).

- 622 37. Ho, K., Huo, W., Pas, S., Dao, R. & Palmer, K. L. Loss of function mutations in  
623 epaR confer resistance to phage NPV1 infection in *Enterococcus faecalis*  
624 OG1RF. *Antimicrob. Agents Chemother.* AAC.00758-18 (2018)  
625 doi:10.1128/AAC.00758-18.
- 626 38. Thurlow, L. R., Thomas, V. C. & Hancock, L. E. Capsular polysaccharide  
627 production in *Enterococcus faecalis* and contribution of CpsF to capsule  
628 serospecificity. *J. Bacteriol.* **191**, 6203–10 (2009).
- 629 39. Hancock, L. E. & Gilmore, M. S. The capsular polysaccharide of *Enterococcus*  
630 *faecalis* and its relationship to other polysaccharides in the cell wall. *Proc. Natl.*  
631 *Acad. Sci. U. S. A.* **99**, 1574–9 (2002).
- 632 40. Teng, F., Singh, K. V, Bourgoigne, A., Zeng, J. & Murray, B. E. Further  
633 characterization of the epa gene cluster and Epa polysaccharides of  
634 *Enterococcus faecalis*. *Infect. Immun.* **77**, 3759–67 (2009).
- 635 41. Baym, M. *et al.* Inexpensive multiplexed library preparation for megabase-sized  
636 genomes. *PLoS One* **10**, 1–15 (2015).
- 637 42. Langmead, B. & Salzberg, S. L. Fast gapped-read alignment with Bowtie 2. *Nat.*  
638 *Methods* **9**, 357–359 (2012).
- 639 43. Li, H. *et al.* The Sequence Alignment/Map format and SAMtools. *Bioinformatics*  
640 (2009) doi:10.1093/bioinformatics/btp352.
- 641 44. Li, H. A statistical framework for SNP calling, mutation discovery, association  
642 mapping and population genetical parameter estimation from sequencing data.  
643 *Bioinformatics* (2011) doi:10.1093/bioinformatics/btr509.
- 644 45. Kearse, M. *et al.* Geneious Basic: An integrated and extendable desktop software  
645 platform for the organization and analysis of sequence data. *Bioinformatics* (2012)

646            doi:10.1093/bioinformatics/bts199.

647
